# Supplementary material for: Factors affecting mortality among HIV positive patients two years after completing recommended therapy for Cryptococcal meningitis in Uganda
Source: PLoS One. 2019 Jan 30;14(1):e0210287. doi: 10.1371/journal.pone.0210287 (PMC6353088; doi:10.1371/journal.pone.0210287)
Supplement: S1 Data extraction checklist — (PDF) [file pone.0210287.s004.pdf]

# **EVALUATION OF SURVIVAL OF HIV POSITIVE PATIENTS FOLLOWING STANDARD TREATMENT FOR CRYPTOCOCCAL MENINGITIS (CCM) IN UGANDA.**

## **Data Extraction checklist from CryptoDex study**

- 1) Patient ID
- 2) Date of birth
- 3) Number of years in school
- 4) Marital status
- 5) Date of HIV diagnosis
- 6) Last lumbar puncture culture
- 7) Investigational product received (randomisation arm)
- 8) Date of starting ARVs
- 9) Date made week 10 in CryptoDex study
- 10) Quality of life at week 10
- 11) Date last known to be alive if lost to follow-up
