# Supplementary material for: Factors affecting mortality among HIV positive patients two years after completing recommended therapy for Cryptococcal meningitis in Uganda
Source: PLoS One. 2019 Jan 30;14(1):e0210287. doi: 10.1371/journal.pone.0210287 (PMC6353088; doi:10.1371/journal.pone.0210287)
Supplement: S1 Dataset — (XLSX) [file pone.0210287.s001.xlsx]

## Sheet: Sheet1
	gender of participant (1=male, 2=female)	Age in years	Education (0=none, 1=primary, 2=secondary, 3=institiution)	marital status (1=married, 2=separated, 3=single)	Days from HIV diagnosis	interventional product (0=placebo, 1=dexamethasone)	Days on ART	Quality of life at week 10 (Baseline)	date lost to followup	Is patient alive? (1=yes, 0=no)	Days to death	Diagnosis at death	place patient died from (1=home, 2=hospital)	how many times was the patient readmitted (0=never, 1=once, 2=2x, 3=3x, 4=more than 3)
	1	27	2	3	682	1	95	4		0	24	severe anemia	2	2
	1	45	1	1	1114	0	1033	50		1				0
	1	41	1	1	299	1	238	60		1				0
	1	47	1	1	156	1	25	50		1				0
	2	34	2	1	124	0	76	5		0	14	HIV wasting syndrome	2	1
	1	43	1	2	186	1	154	60		1				0
	2	53	0	2	203	0	32	60		1				0
	2	24	2	3	203	1	173	60		1				0
	1	30	1	1	333	0	153	50		0	1	bacterial infection	1	0
	1	37	2	1	100	0	1	70		0	69	hypoglycaemia	1	1
	2	28	1	3	1799	1	157	5		0	6	bacterial meningitis, severe anemia	2	1
	1	35	3	2	223	1	15	5		1				0
	1	26	1	1	41641	0	383	5		0	363	dehydration due to dairrhoea and vomitting	1	0
	1	30	1	2	154	0	127	80		1				0
	2	40	2	2	2838	1	2748	40		1				0
	1	39	2	2	90	0	17	65		1				0
	2	41	3	3	951	0	41676	45		0	633	NA	1	0
	1	39	1	1	2777	1	1290	90		1				0
	1	29	1	1	292	0	263	85		1				0
	1	28	1	3	444	1	97			0	677	ccm complications	1	2
	1	39	1	1	2789	0	2654	75		1				0
	1	36	3	1	415	1	409	60		1				0
	2	42	1	2	1374	1	1374			1				3
	1	55	1	1	188	0	108	55		0	190	CCM relapse likely	1	3
	1	32	1	1	41768	1	22	60		0	78	ranal failure	2	1
	2	34	1	1	41772	0	358	60		1				0
	1	30	2	2	330	0	91	90		1				0
	2	37	1	1	1458	0	723	100		0	372	NA	2	0
	1	32	1	1	323	0	276			0	179	diarrhoea	1	0
	2	28	1	2	41815	0	37	70		1				0
	2	34	1	3	455	1	455	80		0	690	cancer	2	1
	1	31	3	3	128	1	-1			0	11	IRIS	2	0
	2	37	1	1	41829	0	37	100		1				0
	1	31	2	1	265	0	251	80		0	130	NA	2	2
	2	28	2	1	186	1	114	90		1				0
	1	52	1	2	1746	0	102	90		1				0
	1	32	2	1	1225	0	875	60		1				0
	1	49	1	1	1746	1	1746	90		1				0
	1	48	2	2	3132	1	721	60		1				0
	1	40	1	1	96	0	-37	70		0	144	ccm relapse	1	2
	2	27	2	1	94	0	38	63		1				0
	1	29	1	1	216	0	42	50		1				0
	1	42		1	83	0	6	60		0	15	septic shock	2	1
	2	39		2	146	0	23	40		0	39	Cryptococcal meningitis relapse	2	1
	2	34	1	2	69	1	10	52		1				0
	2	34	1	2	317	0	55	10		1				0
	1	35	0	1	102	1	23	50		1				0
	1	28	1	1	997	0	924	60		1				1
	2	44	1	2	121	1	76	80		1				0
	1	33		3	1241	0	52	50		0	716		2	1
	1	31	1	2	41579	0	-3	70		1				0
	1	32	1	3	106	1	42	40		1				0
	1	33	1	3	653	0	625	40		1				0
	1	54	2	1	165	1	146	60		0	76	NA	2	1
	1	25	1	1	140	1	100	40		0	14	NA	1	0
	1	39	1	3	3428	0	3398	60		1				0
	2	35	1	1	69	1	28	80		1				0
	2	30	2	1	328	1	326	50		1				0
	1	53	1	3	9812	0	2507	30		1				0
	2	27	1	3	201	0	79	95		1				0
	2	29	1	2	146	0	33	60		0	492	chronic diarrhoea	1	0
	2	27	1	3	207	1	146	50		1				0
	2	45	1	3	41757	0	41757	80		1				0
	1	34	1	1	1701	1	432	50		1				0
	1	34	1	2	118	0	14	70		1				0
	1	24	3	3	70	1	26	94		1				0
	1	35	1	1	790	0	701	50		1				0
	2	44	1	3	742	1	70	30		1				0
	1	33	3	1	70	1	51	90		1				0
	1	36	1	1	3520	1	383	50		1				0
	2	33	1	2	242	0	25	50		1				1
	1	36	2	2	41824	0	127	80		1				0
	1	29	1	1	462	1	27	100		0	30	NA	1	0
	1	29	2	1	1022	0	39	75		1				0
	1	30	1	2	-41	1	-102	70		1				0
	2	28	1	1	3170	1	267	85		0	757	trauma/asault	1	0
	1	18	2	3	3583	0	152	80		1				0
	2	40	2	2	3583	0	1619	60		0	362	Tuberculosis	1	2
	1	33	3	1	73	1	73	50		1				3
	2	42	1	2	87	1	9	60		1				1
	1	58	1	1	152	1	106	40		0	13	adisonian crisis	2	1
	2	43	1	1	5820	1	3994	70		1				3
	2	25	2	2	100	1	0	70		0	234	ccm relapse	2	1
	2	31	2	3	41771	0	98	80		0	73	NA	1	0
	2	40	1	2	131	0	119	80		1				0
	1	38	0	3	146	0	38	90		1				0
	2	39	3	1	329	0	38	85		1				0
	2	35	1	3	4013	1	35	90		1				0
	2	33	1		486	1	465	60	2014-09-22
	1	46	1	1	397	1	42	70		1				0
	1	24	1	3	4178	0	41	70		1				0
	2	22	2	2	41795	0	339	10		0	635	septicaemia	2	1
	2	34	1	1	238	0	71	50		1				0
	2	28	1	2	124	0	35	80		0	143	ccm relapse	1	1
	2	47	0		177	0	152	60	2014-10-28
	2	28	1	2	453	0	201	50		1				0
	2	26	1	1	177	0	60	70		0	643	septicaemia	2	0
	1	40	2	2	309	1	261	85		1				0
	1	26	2	1	493	0	128	70		1				0
	1	37	1	2	7468	1	2979	100		0	109	diarrnoea	2	1
	2	30	2	1	270	1	265	50		1				0
	1	34	1	1	271	0	235	20		0	68	ccm relapse	2	1
	1	30	1	3	869	1	869	75		1				0
	2	28	2	2	83	0	19	80		1				0
	2	27	1	3	83	0	35	60		0	75	anemia	1	1
	2	32	1	1	11803	0	14	60		0	32	septicaemia	1	0
	1	23	1	1	87	0	23	100		1				0
	2	28	1	2	90	1	35	60		1				0
	1	20	1	2	113	0	-76	60		0	741	ccm relapse	1	2
	2	44	0	3	143	0	104	75		1				0
	1	40	3	3	425	1	396	70		1				0
	1	46	2	1	41943	0	338	70		1				0
